# Supplementary material for: Novel two-dimensional ZnO2, CdO2 and HgO2 monolayers: a first-principles-based prediction
Source: Royal Society of Chemistry journal article supplement (doi:10.1039/d1nj01610e), 2021-01-01
Supplement: d1nj01610e1.pdf [file d1nj01610e1.pdf]

## Supplementary information// Novel two-dimensional $\text{ZnO}_2$ , $\text{CdO}_2$ and $\text{HgO}_2$ monolayers: a first-principles-based prediction

M. Faraji, A. Bafekry, D. Gogova, D. M. Hao, M. Ghergherehchi, Chuong V. Nguyen and S.A.H Feghhi

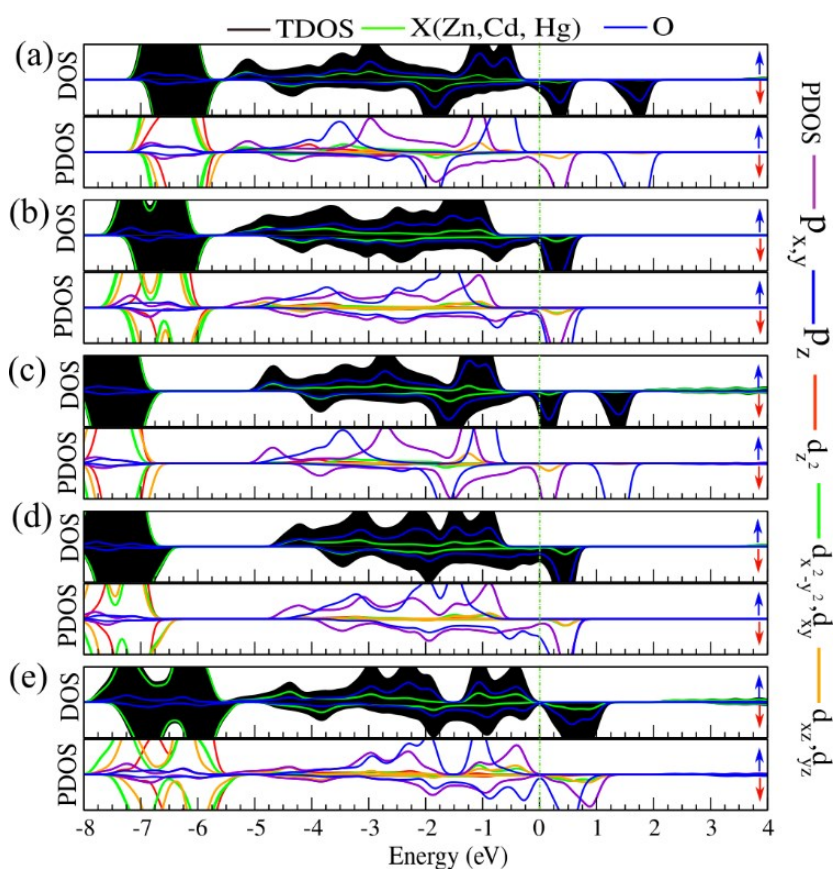

Fig. S1. The contribution of different atomic orbitals for (a)  $\text{ZnO}_2$ -1H, (b)  $\text{ZnO}_2$ -1T, (c)  $\text{CdO}_2$ -1H, (d)  $\text{CdO}_2$ -1T and (e)  $\text{HgO}_2$ -1T.

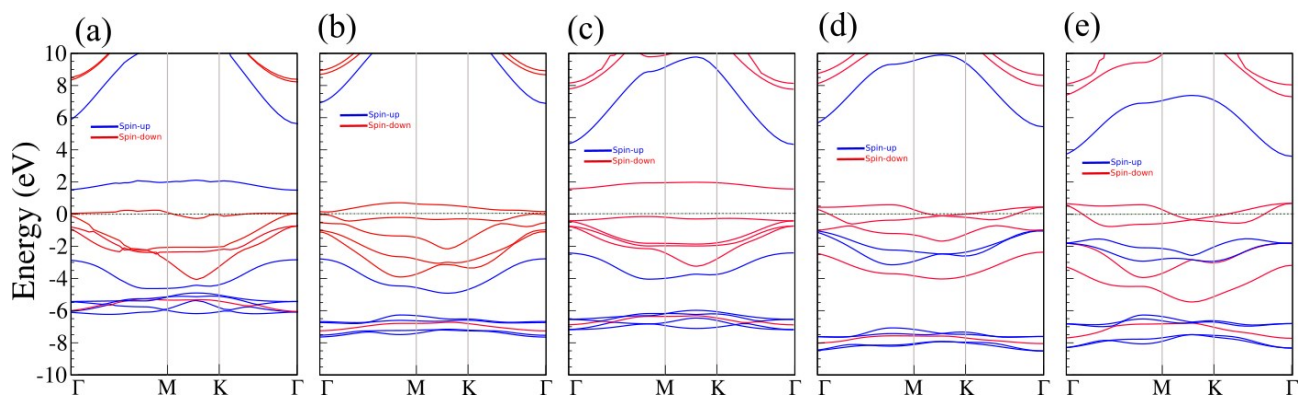

Figure S2. Electronic band structure of (a) ZnO 2 -1H, (b) ZnO 2 -1T, (c) CdO 2 -1H, (d) CdO 2 -1T and (e) HgO 2 -1T monolayers within HSE06 functional. The zero of energy is set to Fermi-level.

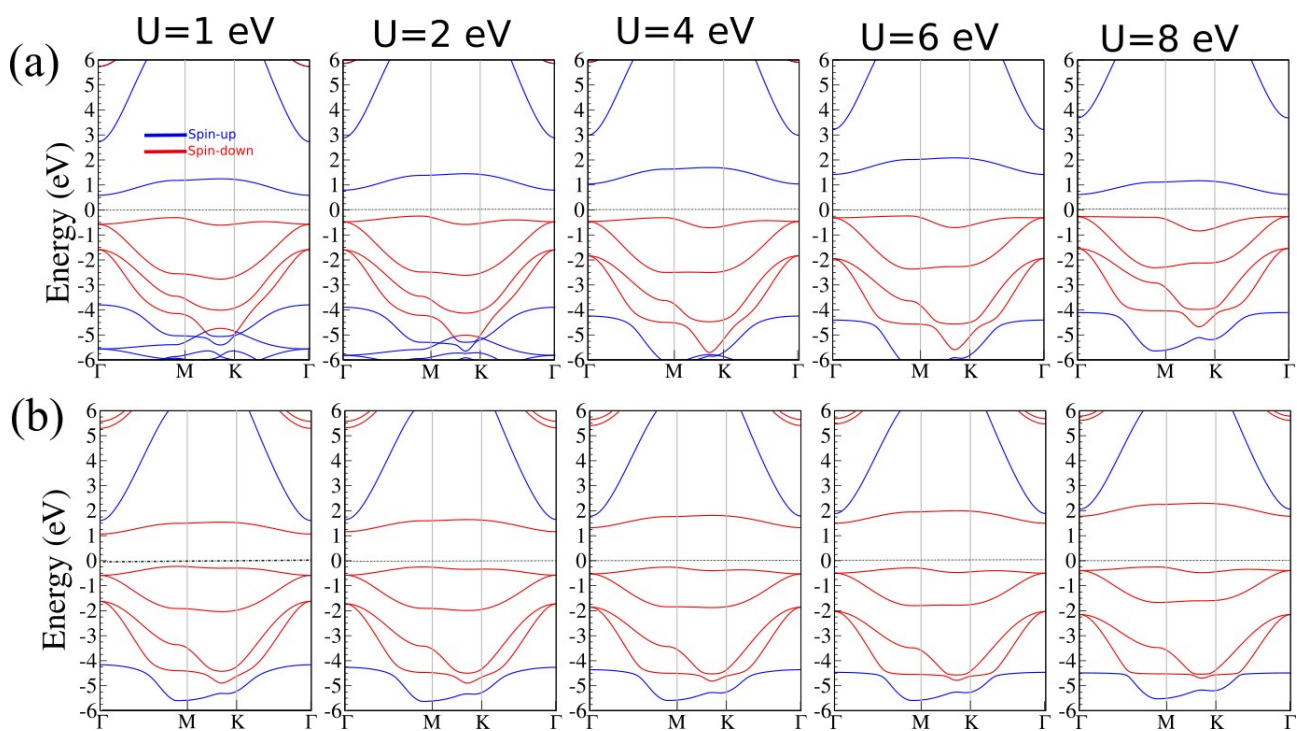

Figure S3: (a) Electronic band structure as a function of Hubbard  $U$  for the (a) ZnO 2 -1H and (b) CdO 2 -1H monolayers. The zero of energy is set to Fermi-level.
